# Supplementary material for: Selection of Non-Saccharomyces Wine Yeasts for the Production of Leavened Doughs
Source: MDPI journal article supplement (doi:10.3390/microorganisms10091849), 2022-09-15
Supplement: s1 [file s1]

**Table S1.** Identification, based on blast comparison in GenBank of ribosomal region 26S rRNA of 10 yeast strains selected on the basis of RAPD-PCR cluster analysis.

| Cluster | Strain | Size | Closest Relative                                  | % Identity | Sequence ID * |
|---------|--------|------|---------------------------------------------------|------------|---------------|
| A       | YFi12  | 573  | <i>Saccharomyces cerevisiae</i> isolate 20170721  | 100%       | MF521980      |
| B       | YG7    | 573  | <i>Torulaspora delbrueckii</i> YMTT5-1            | 100%       | LC387296      |
| C       | YC15   | 590  | <i>Pichia kudriavzevii</i> strain LY49            | 100%       | KY705008      |
| D       | YG8    | 576  | <i>Hanseniaspora uvarum</i> isolate 20170728      | 98%        | MF521987      |
| E       | YA17   | 578  | <i>Hanseniaspora uvarum</i> isolate SFM28         | 100%       | MG017569      |
| F       | YC18   | 588  | <i>Hanseniaspora uvarum</i> isolate 11-1288 la    | 100%       | MH468682      |
| G       | YA27   | 610  | <i>Saccharomyces cerevisiae</i> strain LY183      | 100%       | KY705009      |
| H       | YFa31  | 833  | <i>Metschnikowia pulcherrima</i> culture CBS:2243 | 98%        | KY108490      |
| I       | YA28   | 596  | <i>Hanseniaspora uvarum</i> isolate 11-1288 la    | 100%       | MH468682      |
| L       | YS20   | 921  | <i>Zygotorulaspora florentina</i> CBS 746         | 99%        | NG_058449     |

\* Accession number of the sequence of the closest blast search.
